# Supplementary material
Source: PubMed Central journal article supplement (PMC2947190)
Supplement: NIHMS232869-supplement-03.pdf [file NIHMS232869-supplement-03.pdf]

Fig S1

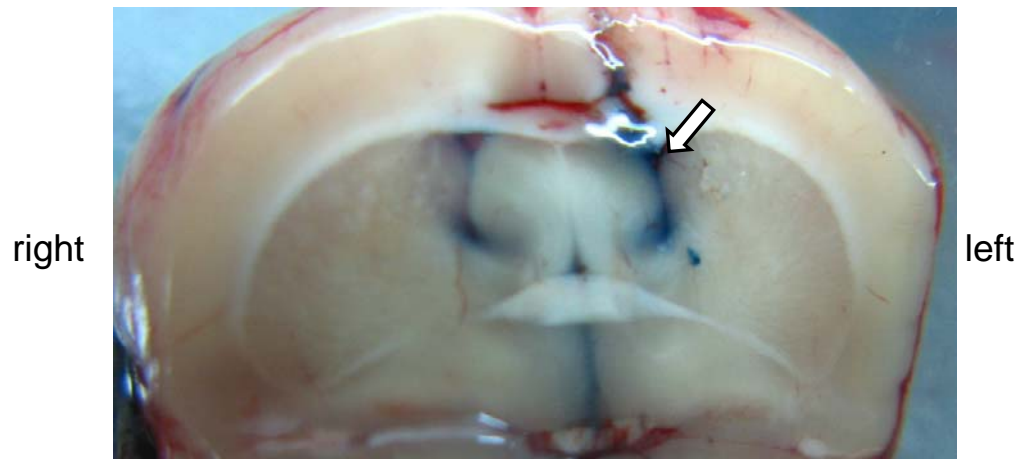

**Fig S1:** Picture (caudal-rostral view) of a rat brain sectioned at the level where cannula was implanted showing the injection site and the spread of the pontamine sky blue dye. Arrow indicated the pontamine sky blue injection site.
